# Supplementary material for: Angiopoietin-2 Blockade Promotes Survival of Corneal Transplants
Source: PubMed Central journal article supplement — Invest Ophthalmol Vis Sci. 2017 Jan;58(1):79–86. doi: 10.1167/iovs.16-20485 (PMC5231909; doi:10.1167/iovs.16-20485), 2017-01
Supplement: iovs-57-15-24_s01.pdf [file iovs-57-15-24_s01.pdf]

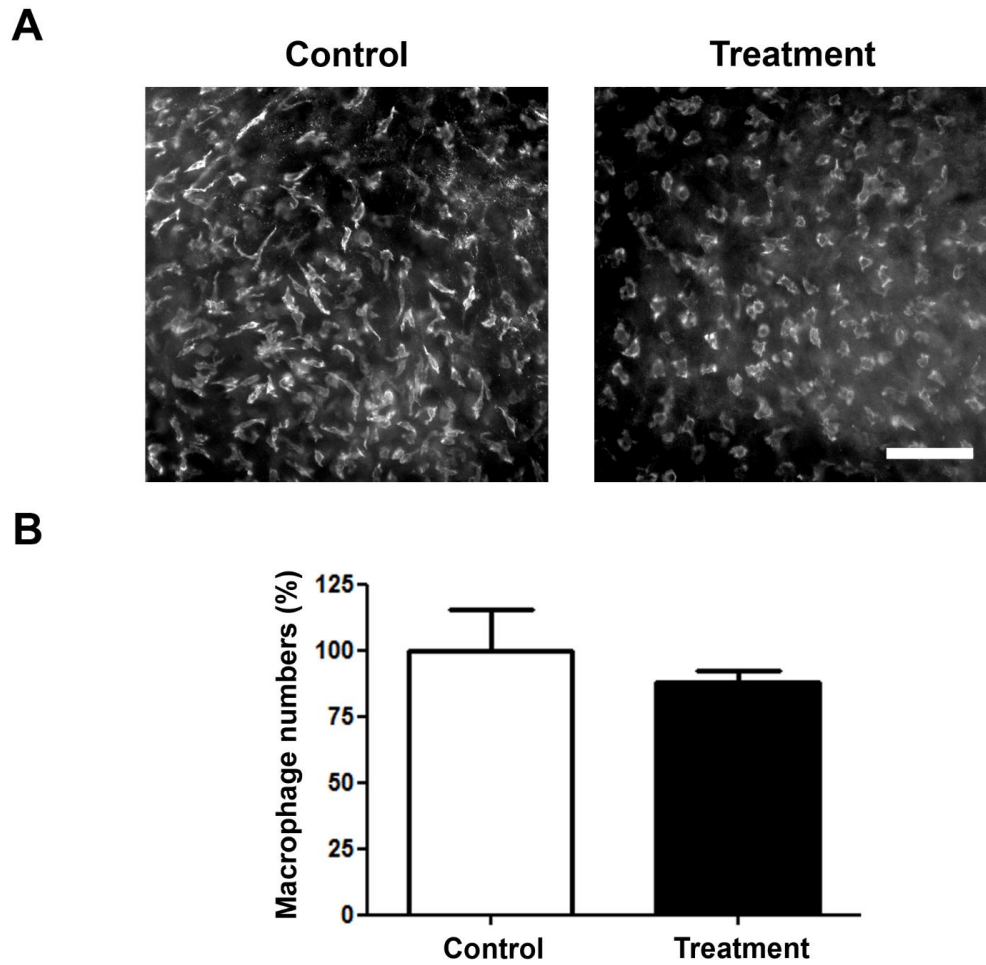

**Supplementary Figure 1.** Effect of Ang-2 blockade on macrophage infiltration and morphological phenotypes after corneal transplantation. (A) Representative immunostaining images at 2 weeks post-surgery showing rounded inactive macrophages in the anti-Ang-2 treated cornea and spindle-shaped activated macrophages in the control cornea. Scale bars: 100  $\mu\text{m}$ . (B) Summarized data showing Ang-2 blockade tended to reduce the number of macrophages in the grafted corneas though the data were not statistically significant ( $P = 0.9$ ).
